# Supplementary material for: An unprecedented spike of the electroluminescence turn-on transience from guest-doped OLEDs with strong electron-donating abilities of host carbazole groups
Source: Royal Society of Chemistry journal article supplement (doi:10.1039/d1mh00941a), 2021-01-01
Supplement: d1mh00941a1.pdf [file d1mh00941a1.pdf]

## 1 Supporting Information

### 2 An unprecedented spike of the electroluminescence turn-on transient from guest-doped 3 OLEDs with strong electron-donating abilities of host carbazole groups

4 *Jing Chen,<sup>1</sup> Xi Zhao,<sup>1</sup> Xiantong Tang,<sup>1</sup> Yaru Ning,<sup>1</sup> Fengjiao Wu,<sup>1</sup> Xiaoli Chen<sup>1</sup>, Hongqiang  
5 Zhu,<sup>2</sup> and Zuhong Xiong<sup>1,\*</sup>*

## 6 Supporting Figures

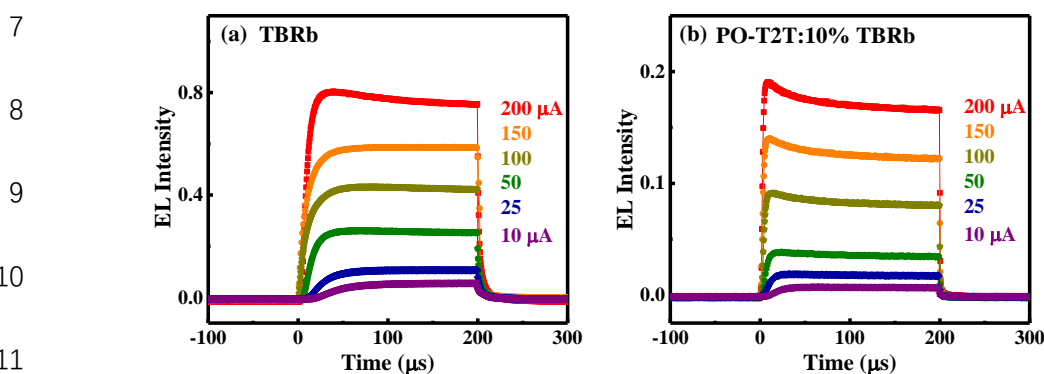

12 **Figure S1.** TEL waveforms of an OLED with the TBRb pure film (a) and PO-T2T:10%TBRb  
13 (b) as the luminescent layer, respectively.

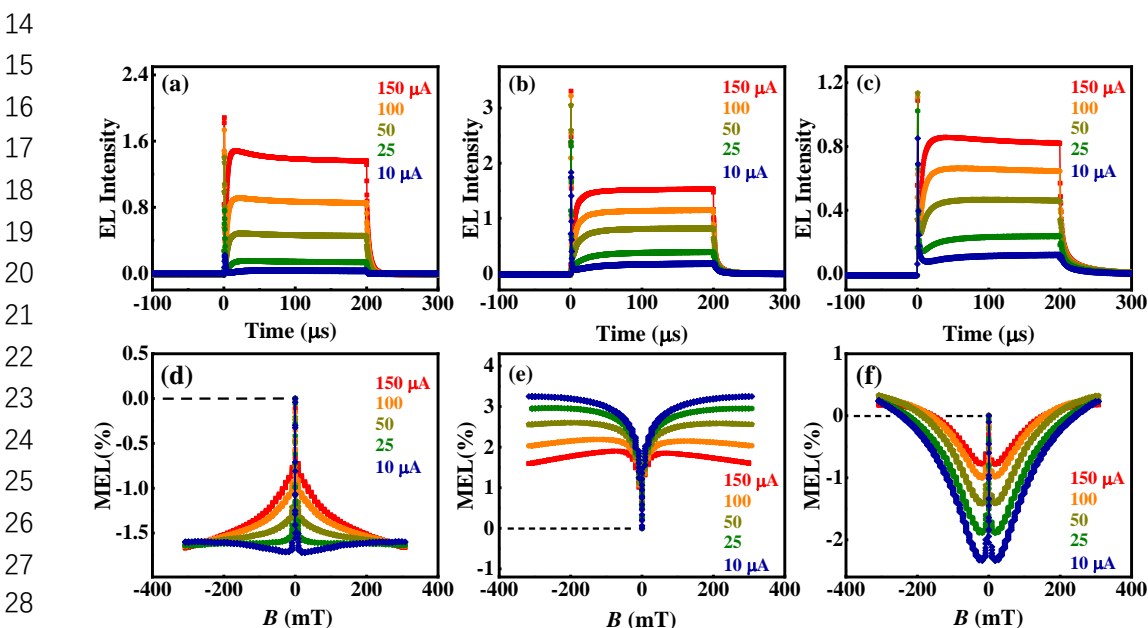

29 **Figure S2.** (a-c) Complete TEL profiles from bias pulse on to off for TBRb-doped OLEDs  
30 applied with different pulsed currents. (d-f) Room-temperature current-dependent MEL

- 1 responses from three different devices.  
 2 (a, d) ITO/PEDOT:PSS/*m*-MTDATA/TCTA:10%TBRb/Bphen/LiF/Al.  
 3 (b, e) ITO/PEDOT:PSS/*m*-MTDATA/TCTA:10%TBRb/Alq<sub>3</sub>/LiF/Al.  
 4 (c, f) ITO/PEDOT:PSS/*m*MTDATA/*m*CP:10%TBRb/Bphen/LiF/Al.

8 **Table S1.** The curve colors corresponding to the different operating temperatures for measuring  
 9 the device TEL curves shown in Figure 2 and Figure S3.

| Curves                                                                             | Temperature | Curves                                                                             | Temperature |
|------------------------------------------------------------------------------------|-------------|------------------------------------------------------------------------------------|-------------|
|   | 300 K       |   | 100 K       |
|   | 250 K       |   | 75 K        |
|   | 200 K       |   | 50 K        |
|   | 150 K       |   | 25 K        |
|  | 125 K       |  | 10 K        |

23 **Table S2.** The spike or ‘spikes’ transition temperatures for different devices studied.

| Device structures         | Spike ending temperature | ‘Spikes’ emergence temperature (rising edge) | ‘Spikes’ emergence temperature (falling edge) |
|---------------------------|--------------------------|----------------------------------------------|-----------------------------------------------|
| TCTA:10%TBTb              | 125 K                    | 125 K                                        | 150 K                                         |
| CBP:10%TBTb               | 125 K                    | 125 K                                        | 125 K                                         |
| <i>m</i> CP:10%TBTb       | 125 K                    | 125 K                                        | 150 K                                         |
| PO-T2T:10%TBTb            | No Spike                 | 75 K                                         | 125 K                                         |
| Alq <sub>3</sub> :10%TBTb | No Spike                 | 75 K                                         | 100 K                                         |
| Bphen:10%TBTb             | No Spike                 | 75 K                                         | 100 K                                         |
| <i>m</i> -MTDATA:10%TBTb  | No Spike                 | 150 K                                        | 125 K                                         |
| TAPC:10%TBTb              | No Spike                 | 100 K                                        | 75 K                                          |
| NPB:10%TBTb               | No Spike                 | 150 K                                        | 75 K                                          |

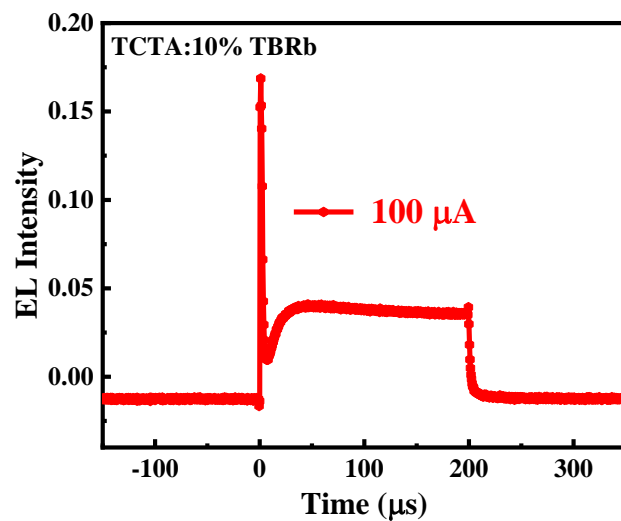

**Figure S3.** The TEL waveform from the device structure of ITO/PEDOT:PSS/*m*-MTDATA (60 nm)/TCTA:10%TBRb(40 nm)/Bphen(60 nm)/LiF(1 nm)/Al(100 nm) using a high pass filter of 450 nm wavelength.

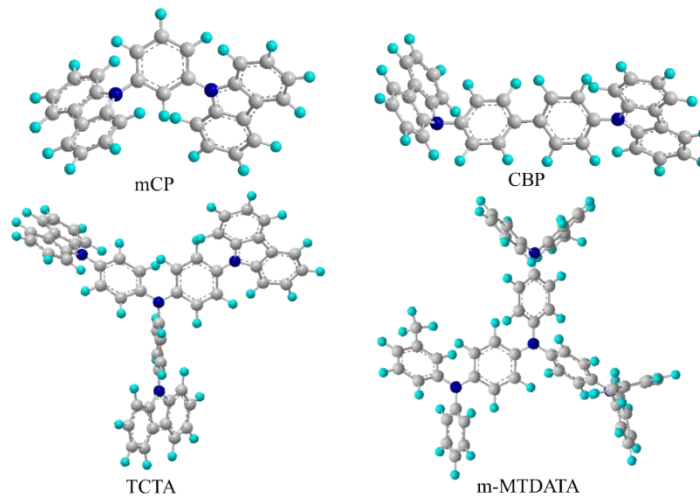

**Figure S4.** The molecular spatial structures of four host materials (*m*CP, CBP, TCTA and *m*-MTDATA). One nitrogen atom and two benzene rings form a pentagonal structure and two benzene rings form carbazole.

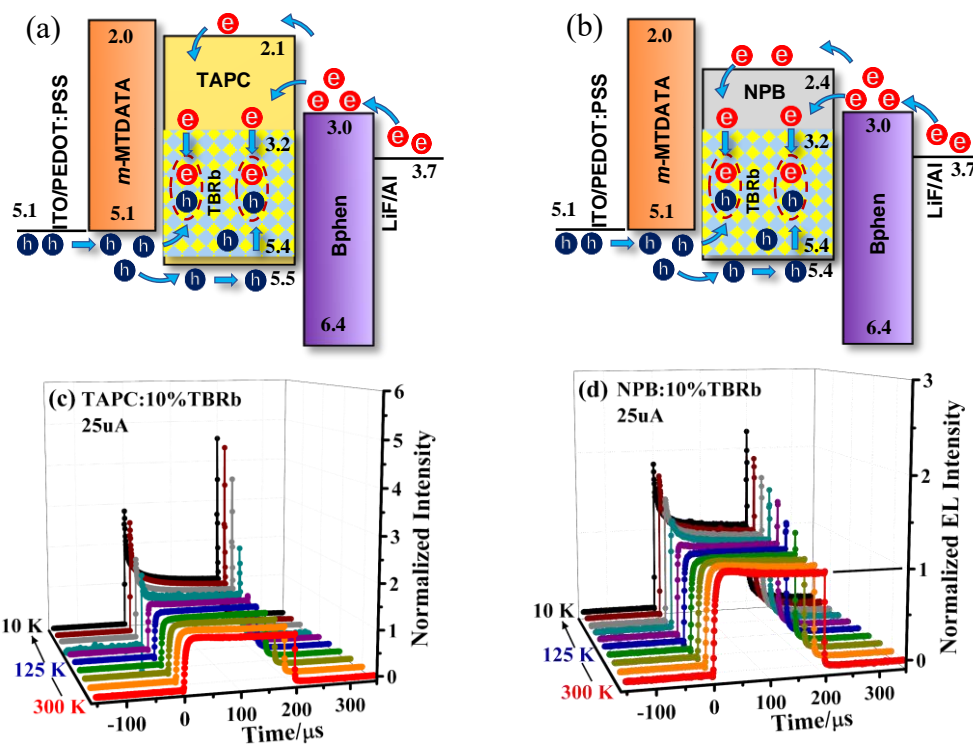

**Figure S5.** (a, b) Schematic diagram of energy level structures and the charge-carrier dynamic processes of TBRb-doped OLEDs with the hosts of TAPC and NPB, respectively. (c, d) Temperature-dependent TEL curves acquired at the pulsed bias current of 25  $\mu\text{A}$  from OLEDs based on various host materials of NPB and TAPC. Here, the devices structures are ITO/PEDOT:PSS/*m*-MTDATA (60 nm)/ host:10%TBRb (40 nm)/Bphen (60 nm)/LiF (1 nm) /Al (100 nm).

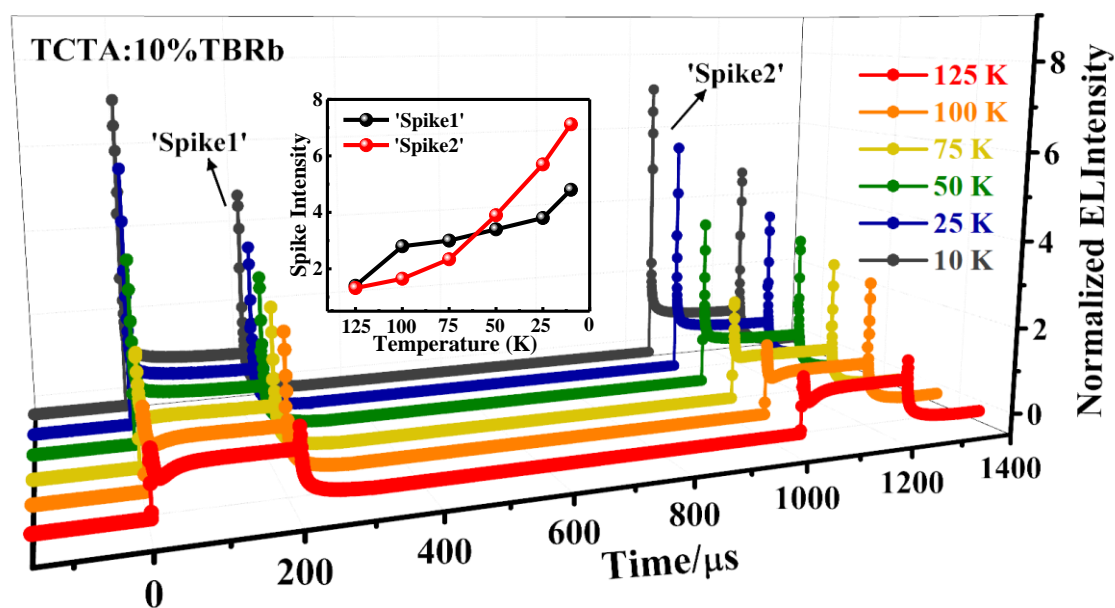

**Figure S6.** Two cycles of pulsed voltage and TEL response for the devices of ITO/PEDOT:PSS/*m*-MTDATA (60 nm)/TCTA:10%TBRb(40 nm)/Bphen(60 nm)/LiF(1 nm)/Al(100 nm) at 25  $\mu$ A from 125 K to 10 K. The inset shows the intensity of ‘spike1’ and ‘spike2’ from 125 K to 10 K.

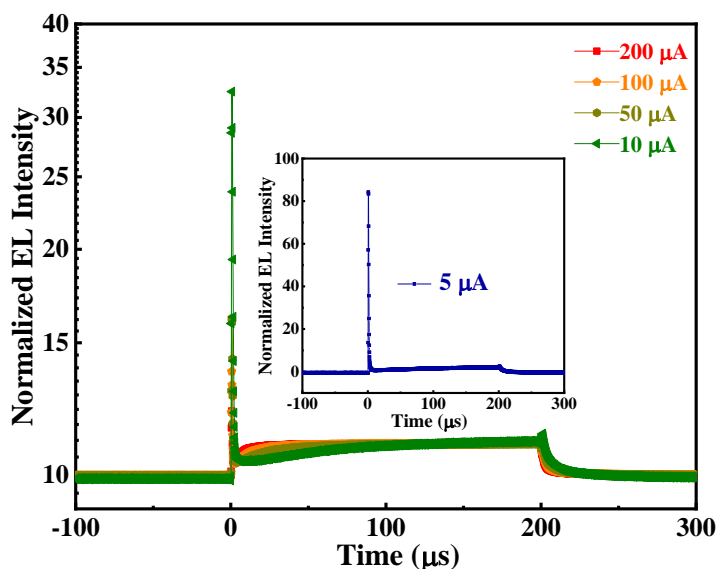

**Figure S7.** The TEL measurement for the structure of ITO/PEDOT:PSS/*m*-MTDATA (60 nm)/TCTA:15%TBRb (40 nm)/Alq<sub>3</sub> (60 nm)/LiF (1 nm)/Al (100 nm). The inset shows the corresponding TEL waveform acquired at a current of 5  $\mu$ A. The spike height is 87 times of the steady-state luminescence intensity.

1  
2  
3  
4  
5  
6  
7  
8  
9  
10  
11  
12  
13  
14  
15  
16  
17  
18  
19  
20  
21  
22  
23

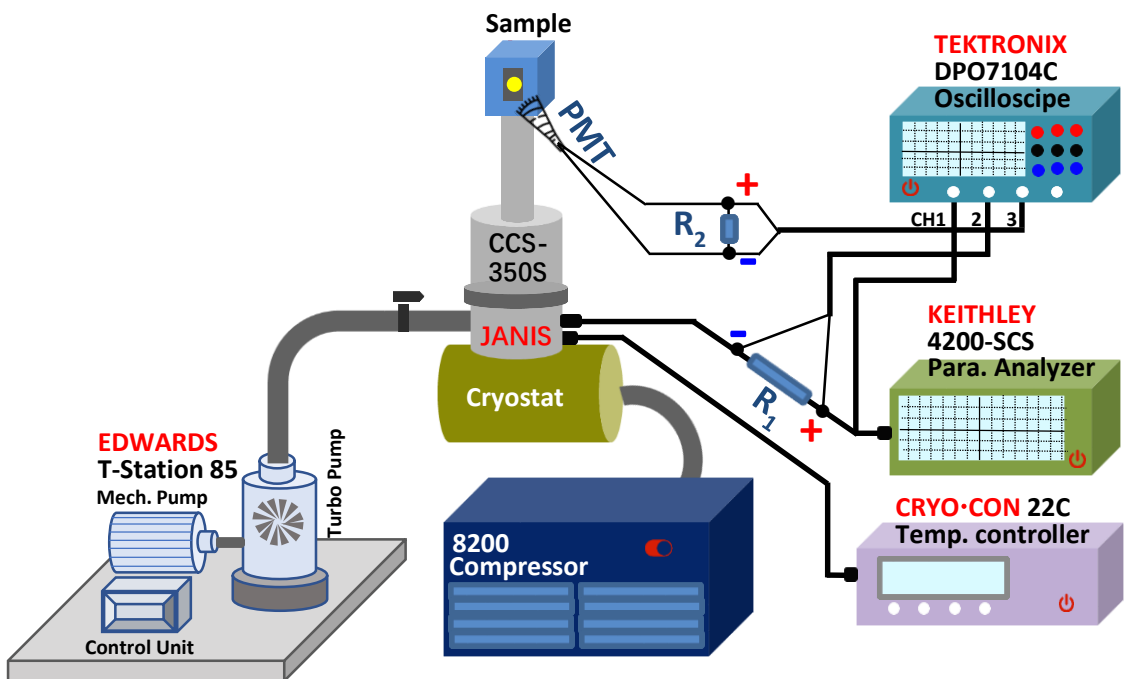

**Figure S8.** The vacuum system is composed of mechanical pump and molecular pump, the vacuum degree can be less than  $10^{-4}$  Pa. Keithley 4200 is a pulse function generator, which can adjust pulse period, pulse width, pulse height, and frequency. The oscilloscope is mainly used to display the voltage signal collected by the resistance.
